# Supplementary material for: Ongoing Evolution in the Genus Crocus: Diversity of Flowering Strategies on the Way to Hysteranthy
Source: MDPI journal article supplement (doi:10.3390/plants10030477), 2021-03-03
Supplement: s1 [file s1]

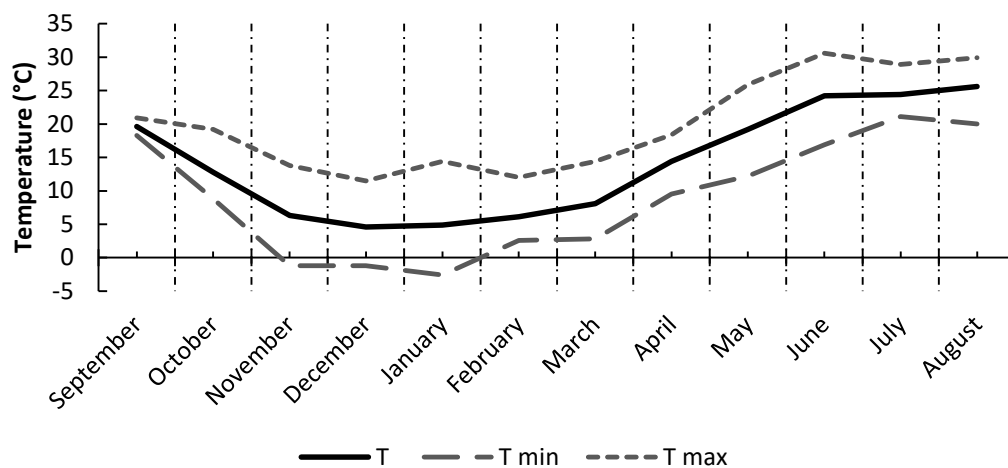

**Figure S1.** Variations in temperature throughout the year in the experimental field of the CIAF during the trial whose aim was to study the phenology of Spanish Crocus species grown under cover.
