# Supplementary material for: Ongoing Evolution in the Genus Crocus: Diversity of Flowering Strategies on the Way to Hysteranthy
Source: MDPI journal article supplement (doi:10.3390/plants10030477), 2021-03-03
Supplement: s1 [file s1]

**Table S4.** Flowering time of the earliest and latest populations of 112 accessions of seven Spanish crocuses under the same environmental conditions (common garden experiment).

| Species                 | Time of flowering   |                   |
|-------------------------|---------------------|-------------------|
|                         | Earliest population | Latest population |
| <i>C. serotinus</i>     | 5-Oct               | 4-Nov             |
| <i>C. clusii</i>        | 11-Nov              | 16-Nov            |
| <i>C. nudiflorus</i>    | 21-Oct              | 7-Nov             |
| <i>C. cambessedesii</i> | 28-Oct              | 9-Nov             |
| <i>C. nevadensis</i>    | 10-Jan              | 1-Mar             |
| <i>C. carpetanus</i>    | 23-Jan              | 6-Feb             |
| <i>C. vernus</i>        | 6-Mar               | 28-Mar            |
