# Supplementary material for: Ongoing Evolution in the Genus Crocus: Diversity of Flowering Strategies on the Way to Hysteranthy
Source: MDPI journal article supplement (doi:10.3390/plants10030477), 2021-03-03
Supplement: s1 [file s1]

**Table S3.** Variance components in phenological traits of Spanish *Crocus* species.

| Phenological traits* | Variance partitioning |           |                |           |
|----------------------|-----------------------|-----------|----------------|-----------|
|                      | Between species       |           | Within species |           |
|                      | %                     | <i>fd</i> | %              | <i>fd</i> |
| Sprouting time       | 83.01                 | 6         | 16.99          | 80        |
| Leaf emergence       | 69.40                 | 6         | 30.60          | 97        |
| Flowering time       | 96.40                 | 6         | 3.60           | 54        |
| Leaf senescence      | 43.68                 | 6         | 56.32          | 100       |

\* Measured as the number of days between the date of planting (1<sup>st</sup> of August) and a certain stage.
