# Supplementary material for: Ongoing Evolution in the Genus Crocus: Diversity of Flowering Strategies on the Way to Hysteranthy
Source: MDPI journal article supplement (doi:10.3390/plants10030477), 2021-03-03
Supplement: s1 [file s1]

**Table S2.** Accessions evaluated in the study of the phenology of Spanish *Crocus* species under cultivation. Accessions and Spanish provinces where they were collected are indicated for each species.

| SPECIES                           | PROVINCE    | ACCESSIONS                                                                                                                         |
|-----------------------------------|-------------|------------------------------------------------------------------------------------------------------------------------------------|
| <i>C. cambessedesii</i>           | Mallorca    | BCU001680, BCU001682, BCU001683, BCU001685                                                                                         |
|                                   | Nursery     | BCU003130                                                                                                                          |
| <i>C. carpetanus</i>              | Ávila       | BCU002835, BCU002836, BCU002837, BCU002838                                                                                         |
|                                   | Madrid      | BCU002971, BCU002972, BCU002973, BCU002974, BCU002987                                                                              |
|                                   | Ourense     | BCU002696                                                                                                                          |
| <i>C. clusii</i>                  | Huelva      | BCU002960, BCU002961, BCU002962, BCU002963                                                                                         |
|                                   | Cádiz       | BCU002964, BCU002965, BCU002966, BCU002967                                                                                         |
| <i>C. nevadensis</i>              | Cuenca      | BCU002871, BCU002969, BCU003012, BCU002355, BCU002356, BCU002359, BCU002687, BCU002689, BCU002690, BCU002693, BCU002694, BCU002695 |
|                                   | Granada     | BCU002976, BCU002977, BCU002979, BCU002980, BCU002386, BCU002387, BCU002388                                                        |
|                                   | Huesca      | BCU002992, BCU002993, BCU002994, BCU002999                                                                                         |
|                                   | Jaén        | BCU002981, BCU002982, BCU002380, BCU002381, BCU002382, BCU002383, BCU002384, BCU002385                                             |
|                                   | Lérida      | BCU002988, BCU002989, BCU002990                                                                                                    |
|                                   | Pamplona    | BCU002697, BCU002698                                                                                                               |
|                                   | Valencia    | BCU001742                                                                                                                          |
|                                   | Burgos      | BCU003176                                                                                                                          |
| <i>C. nudiflorus</i>              | Huesca      | BCU002944, BCU003000, BCU003001, BCU003002, BCU003003, BCU003004, BCU003015, BCU002556, BCU002557, BCU002558, BCU002559            |
|                                   | La Rioja    | BCU003123, BCU002776, BCU002779                                                                                                    |
|                                   | Lérida      | BCU003005, BCU003006, BCU003007                                                                                                    |
|                                   | La Coruña   | BCU002741                                                                                                                          |
| <i>C. serotinus</i>               | Albacete    | BCU002550, BCU002740, BCU002742                                                                                                    |
|                                   | Burgos      | BCU003175                                                                                                                          |
|                                   | Ciudad Real | BCU002366, BCU002367, BCU002685, BCU002686, BCU002873, BCU002970, BCU003013, BCU002743,                                            |
|                                   | Cuenca      | BCU002775                                                                                                                          |
|                                   | Granada     | BCU002978                                                                                                                          |
|                                   | Huelva      | BCU002959                                                                                                                          |
|                                   | Jaén        | BCU001655, BCU001657                                                                                                               |
|                                   | León        | BCU003172, BCU003173, BCU003174, BCU003177, BCU003178, BCU003179, BCU003180, BCU003181                                             |
|                                   | Toledo      | BCU001704, BCU001705                                                                                                               |
|                                   | Valencia    | BCU002618, BCU002619                                                                                                               |
| <i>C. vernus subs. albiflorus</i> | Nursery     | BCU002998, BCU003018, BCU001822, BCU002730                                                                                         |
