# Supplementary material for: Ongoing Evolution in the Genus Crocus: Diversity of Flowering Strategies on the Way to Hysteranthy
Source: MDPI journal article supplement (doi:10.3390/plants10030477), 2021-03-03
Supplement: s1 [file s1]

**Table S1.** Location data of *Crocus* accessions evaluated in their natural environment.

| Accession number | Species                             | State               | Province | Locality                         | Latitude         | Longitude       | Elevation (m.a.s.l.) |
|------------------|-------------------------------------|---------------------|----------|----------------------------------|------------------|-----------------|----------------------|
| BCU001680        | <i>C. cambessedesii</i> J. Gay      | Islas Baleares      | Mallorca | Es Repla (Arta)                  | 39° 43' 33.8" N  | 3° 18' 31.6" E  | 164                  |
| BCU001682        | <i>C. cambessedesii</i> J. Gay      | Islas Baleares      | Mallorca | Partida de Fuster (Capdepera)    | 39° 42' 32.3" N  | 3° 26' 36.1" E  | 30                   |
| BCU001683        | <i>C. cambessedesii</i> J. Gay      | Islas Baleares      | Mallorca | Tunel de Formentor               | 39° 54' 46.2" N  | 3° 04' 16.1" E  | 170                  |
| BCU001685        | <i>C. cambessedesii</i> J. Gay      | Islas Baleares      | Mallorca | Cami de Can Mameta (Caimari)     | 39° 46' 57.3" N  | 2° 53' 58.2" E  | 250                  |
| BCU002971        | <i>C. carpetanus</i> Boiss. & Reut. | Comunidad de Madrid | Madrid   | Montejo de la Sierra (Hayedo)    | 41° 04' 16.4" N  | 3° 31' 38.2" O  | 1242                 |
| BCU002972        | <i>C. carpetanus</i> Boiss. & Reut. | Comunidad de Madrid | Madrid   | Robregordo                       | 41° 06' 52.8" N  | 3° 35' 38.3" O  | 1356                 |
| BCU002973        | <i>C. carpetanus</i> Boiss. & Reut. | Comunidad de Madrid | Madrid   | Robregordo                       | 41° 07' 34.2" N  | 3° 36' 12.2" O  | 1468                 |
| BCU002974        | <i>C. carpetanus</i> Boiss. & Reut. | Comunidad de Madrid | Madrid   | Robregordo                       | 41° 07' 11.9" N  | 3° 36' 11.7" O  | 1446                 |
| BCU002696        | <i>C. carpetanus</i> Boiss. & Reut. | Galicia             | Ourense  | Muinos (Requias, Serra do Xures) | 41° 53' 16" N    | 7° 56' 37" O    | 1100                 |
| BCU002969        | <i>C. nevadensis</i> Amo            | Castilla-La Mancha  | Cuenca   | Olmeda del Rey                   | 39° 45' 52.4" N  | 2° 01' 36.91" O | 1100                 |
| BCU002976        | <i>C. nevadensis</i> Amo            | Andalucía           | Granada  | Güejar Sierra                    | 37° 07' 47" N    | 3° 26' 57.7" O  | 1610                 |
| BCU002977        | <i>C. nevadensis</i> Amo            | Andalucía           | Granada  | Monachil                         | 37° 06' 53.4" N  | 3° 27' 02.5" O  | 1800                 |
| BCU002979        | <i>C. nevadensis</i> Amo            | Andalucía           | Granada  | Monachil                         | 37° 07' 37.6" N  | 3° 27' 05.5" O  | 1688                 |
| BCU002980        | <i>C. nevadensis</i> Amo            | Andalucía           | Jaén     | Quesada                          | 37° 52' 04.08" N | 3° 00' 58.7" O  | 1172                 |
| BCU002981        | <i>C. nevadensis</i> Amo            | Andalucía           | Jaén     | Cazorla                          | 37° 53' 50.7" N  | 2° 59' 17.8" O  | 1145                 |
| BCU002982        | <i>C. nevadensis</i> Amo            | Andalucía           | Jaén     | Quesada                          | 37° 52' 18.3" N  | 3° 00' 15.9" O  | 1333                 |
| BCU002356        | <i>C. nevadensis</i> Amo            | Castilla-La Mancha  | Cuenca   | Motilla del Palancar             | 39° 31' 48.84" N | 1° 54' 45.83" O | 822                  |
| BCU002693        | <i>C. nevadensis</i> Amo            | Castilla-La Mancha  | Cuenca   | Altomira                         | 40° 10' 52.47" N | 2° 49' 34.14" O | 1150                 |
| BCU002695        | <i>C. nevadensis</i> Amo            | Castilla-La Mancha  | Cuenca   | Olmeda del Rey                   | 39° 45' 52.4" N  | 2° 01' 36.91" O | 1100                 |
| BCU002697        | <i>C. nevadensis</i> Amo            | Navarra             | Pamplona | Lazagurria                       | 42° 29' 23.2" N  | 2° 12' 59.9" O  | 700                  |
| BCU002698        | <i>C. nevadensis</i> Amo            | Navarra             | Pamplona | Tafalla                          | 42° 34' 47.1" N  | 1° 42' 09.7" O  | 600                  |
| BCU003123        | <i>C. nudiflorus</i> S.M.           | La Rioja            | La Rioja | Villoslada de cameros            | 42° 02' 49.47" N | 2° 40' 44.13" O | 1415                 |
| BCU002556        | <i>C. nudiflorus</i> S.M.           | Aragón              | Huesca   | Benasque                         | 42° 40' 0.93" N  | 0° 3' 7.65" E   | 1800                 |
| BCU002557        | <i>C. nudiflorus</i> S.M.           | Aragón              | Huesca   | Benasque                         | 42° 40' 6.89" N  | 0° 3' 9" E      | 2000                 |

| Accession number | Species                     | State                | Province | Locality                | Latitude         | Longitude        | Elevation (m.a.s.l.) |
|------------------|-----------------------------|----------------------|----------|-------------------------|------------------|------------------|----------------------|
| BCU002558        | <i>C. nudiflorus</i> S.M.   | Aragón               | Huesca   | Benasque                | 42° 40' 87" N    | 0° 3' 6.26" E    | 1700                 |
| BCU002559        | <i>C. nudiflorus</i> S.M.   | Aragón               | Huesca   | Benasque                | 42° 36' 87" N    | 0° 3' 1.85" E    | 1200                 |
| BCU002735        | <i>C. nudiflorus</i> S.M.   | Aragón               | Huesca   | Laspuña                 | 42° 28' 56.4" N  | 0° 14' 29.2" E   | 1275                 |
| BCU002736        | <i>C. nudiflorus</i> S.M.   | Aragón               | Huesca   | Laspuña, Bassa de Mora  | 42° 33' 00.5" N  | 0° 19' 20.4" ' E | 1890                 |
| BCU002737        | <i>C. nudiflorus</i> S.M.   | Cataluña             | Lerida   | Valle de Boi            | 42° 29' 12.95" N | 0° 52' 26.40" E  | 2100                 |
| BCU002738        | <i>C. nudiflorus</i> S.M.   | Cataluña             | Lerida   | Valle de Boi            | 42° 29' 9.07" N  | 0° 52' 23.68" E  | 2095                 |
| BCU002739        | <i>C. nudiflorus</i> S.M.   | Cataluña             | Lerida   | Valle de Boi            | 42° 28' 58.56" N | 0° 52' 23.21" E  | 2095                 |
| BCU002776        | <i>C. nudiflorus</i> S.M.   | La Rioja             | La Rioja | San Millán de la Cogola | 42° 14' 52" N    | 2° 55' 59" E     | 1360                 |
| BCU002777        | <i>C. nudiflorus</i> S.M.   | La Rioja             | La Rioja | Manzanares de Rioja     | 42° 20' 49" N    | 2° 54' 57" E     | 1270                 |
| BCU002779        | <i>C. nudiflorus</i> S.M.   | La Rioja             | La Rioja | Manzanares de Rioja     | 42° 22' 46" N    | 2° 54' 10" E     | 910                  |
| BCU002960        | <i>C. clusii</i> J. Gay     | Andalucía            | Huelva   | Doñana                  | 37° 10' 21" N    | 6° 38' 57" O     | 30                   |
| BCU002961        | <i>C. clusii</i> J. Gay     | Andalucía            | Huelva   | Doñana                  | 37° 10' 21" N    | 6° 38' 18" O     | 31                   |
| BCU002962        | <i>C. clusii</i> J. Gay     | Andalucía            | Huelva   | Hinojos                 | 37° 16' 11" N    | 6° 25' 32" O     | 88                   |
| BCU002963        | <i>C. clusii</i> J. Gay     | Andalucía            | Huelva   | Hinojos                 | 37° 16' 52" N    | 6° 23' 57" O     | 84                   |
| BCU002964        | <i>C. clusii</i> J. Gay     | Andalucía            | Cádiz    | Chipiona                | 36° 42' 45" N    | 6° 25' 4" O      | 14                   |
| BCU002965        | <i>C. clusii</i> J. Gay     | Andalucía            | Cádiz    | Puerto Real             | 36° 31' 22" N    | 6° 9' 5" O       | 27                   |
| BCU002966        | <i>C. clusii</i> J. Gay     | Andalucía            | Cádiz    | Laguna de la Paja       | 36° 23' 25" N    | 6° 7' 20" O      | 27                   |
| BCU002967        | <i>C. clusii</i> J. Gay     | Andalucía            | Cádiz    | Laguna de la Paja       | 36° 23' 26" N    | 6° 7' 50" O      | 25                   |
| BCU002959        | <i>C. serotinus</i> Salisb. | Andalucía            | Huelva   | Aracena                 | 37° 53' 0.35" O  | 6° 46' 38.6" O   | 880                  |
| BCU003172        | <i>C. serotinus</i> Salisb. | Castilla y León      | León     | Villamanín              | 42° 55' 57.3"N   | 5° 39' 19.8" O   | 1204                 |
| BCU003173        | <i>C. serotinus</i> Salisb. | Castilla y León      | León     | Barrios de Luna         | 42° 52' 21.3"N   | 5° 55' 7.9" O    | 1395                 |
| BCU003175        | <i>C. serotinus</i> Salisb. | Castilla y León      | Burgos   | Las Cañadillas          | 42° 38' 49.9"N   | 3° 40' 27.4" O   | 1032                 |
| BCU003177        | <i>C. serotinus</i> Salisb. | Castilla y León      | Burgos   | La Revuelta             | 42° 38' 17.7" N  | 3° 40' 57.9" O   | 1047                 |
| BCU003179        | <i>C. serotinus</i> Salisb. | Castilla y León      | León     | Barrios de Luna         | 42° 49' 38.2"N   | 5° 50' 22" O     | 1108                 |
| BCU001704        | <i>C. serotinus</i> Salisb. | Castilla-La Mancha   | Toledo   | Villarrubia de Santiago | 40° 00' 24" N    | 3° 22' 33" O     | 680                  |
| BCU002618        | <i>C. serotinus</i> Salisb. | Comunidad Valenciana | Valencia | Caroche (Vértice Geo)   | 39° 05' 25" N    | 0° 54' 56" O     | 1085                 |

| Accession number | Species                     | State                | Province    | Locality                  | Latitude         | Longitude       | Elevation (m.a.s.l.) |
|------------------|-----------------------------|----------------------|-------------|---------------------------|------------------|-----------------|----------------------|
| BCU002619        | <i>C. serotinus</i> Salisb. | Comunidad Valenciana | Valencia    | Caroche (Balsa)           | 39° 05' 37" N    | 0° 55' 05" O    | 1044                 |
| BCU002685        | <i>C. serotinus</i> Salisb. | Castilla-La Mancha   | Ciudad Real | Almagro                   | 38°53'34.04"     | 03°44'9.67"     | 646                  |
| BCU002740        | <i>C. serotinus</i> Salisb. | Castilla-La Mancha   | Albacete    | Tus, Sierra de Segura     | 38° 24' 09.1" N  | 2° 25' 09.4" O  | 1300                 |
| BCU002741        | <i>C. serotinus</i> Salisb. | Galicia              | A Coruña    | Mazaricos                 | 42° 54' 33.26"N  | 9° 06' 16.97" O | 320                  |
| BCU002742        | <i>C. serotinus</i> Salisb. | Castilla-La Mancha   | Albacete    | Tus, Sierra de Segura     | 38° 24' 01.3" N  | 2° 24' 07.9" O  | 1454                 |
| BCU002743        | <i>C. serotinus</i> Salisb. | Castilla-La Mancha   | Cuenca      | Altomira                  | 40° 10' 52.47" N | 2° 49' 34.14" O | 1150                 |
| BCU002392        | <i>C. vernus</i> (L.) Hill  | Aragón               | Huesca      | Jaca (Refugio de Boyeros) | 42° 44' 25" N    | 0° 35' 11" O    | 1560                 |
| BCU003198        | <i>C. vernus</i> (L.) Hill  | Aragón               | Huesca      | Jaca (Refugio de Boyeros) | 42° 45' 49" N    | 0° 37' 23" O    | 1581                 |
