# Supplementary material for: Ongoing Evolution in the Genus Crocus: Diversity of Flowering Strategies on the Way to Hysteranthy
Source: MDPI journal article supplement (doi:10.3390/plants10030477), 2021-03-03

**Figure S3.** Sequence of flower development under (yellow frame) and aboveground (green frame), and senescence (brown frame), for autumn *C. serotinus* (A) and spring *C. nevadensis* and *C. vernus* (B-C). After harvesting, corms were stored at 23°C and planted in September, after flower bud differentiation. The temperature decreased to 10°C in early October. Phenological stages represented by at least 80% of the plants. Cataphylls were removed in yellow framed photos.

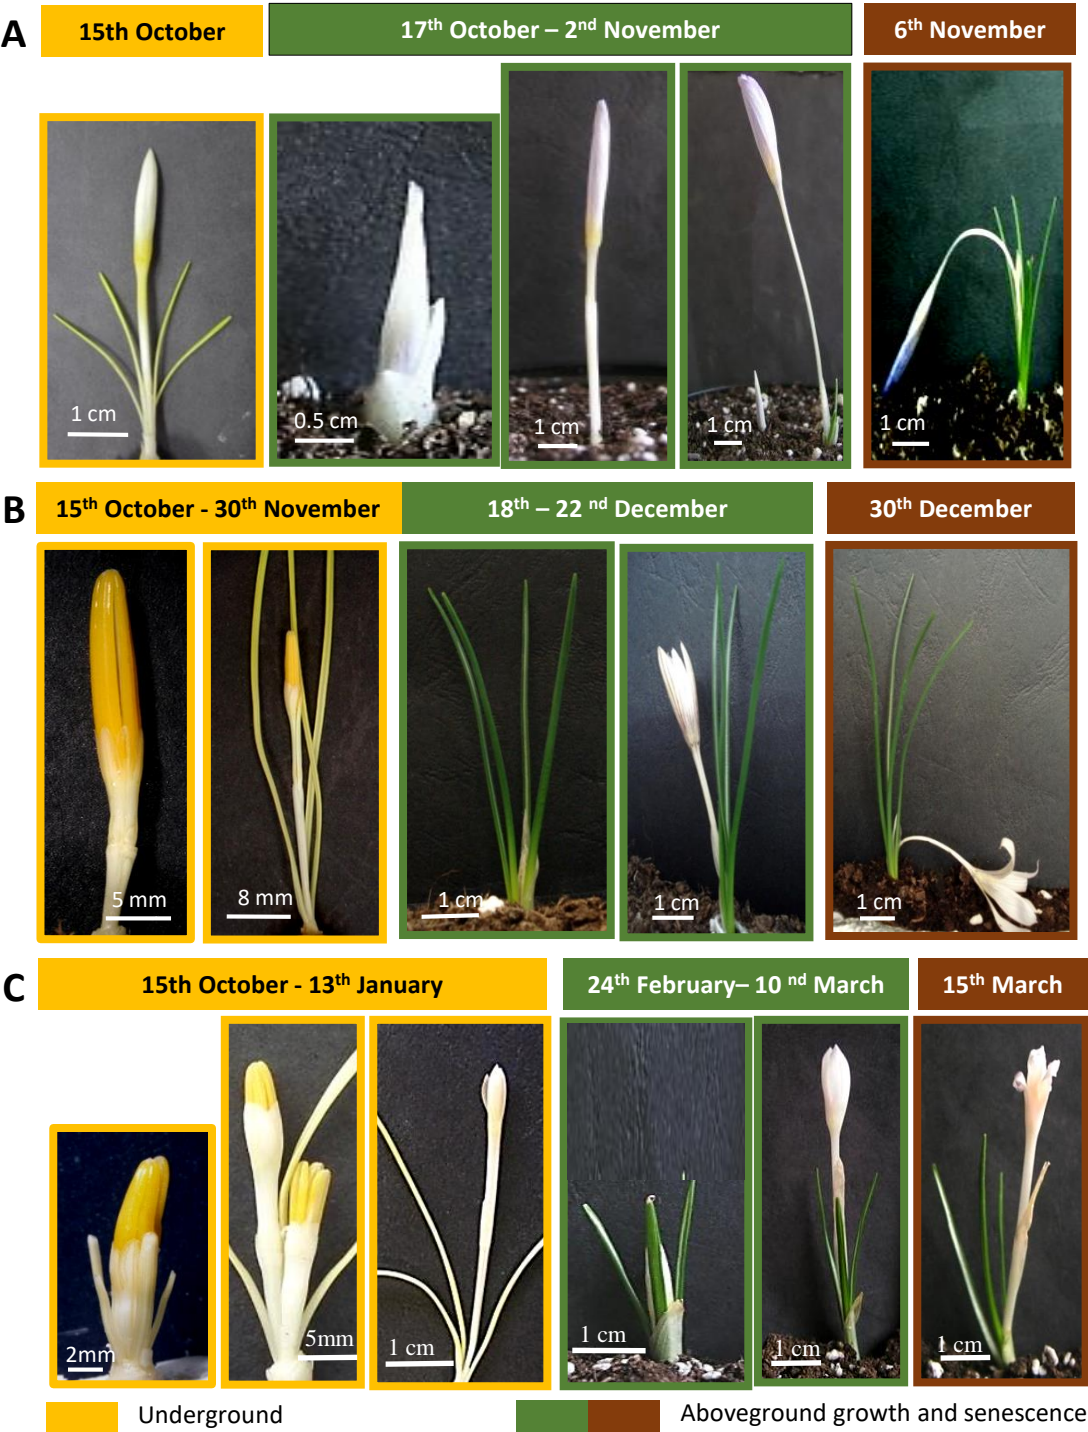

Supplement: s1 [file s1]
