# Supplementary material for: Ongoing Evolution in the Genus Crocus: Diversity of Flowering Strategies on the Way to Hysteranthy
Source: MDPI journal article supplement (doi:10.3390/plants10030477), 2021-03-03

**Figure S2.** Relation between altitude at which autumn-crocus grow in their natural habitats and the flowering time.

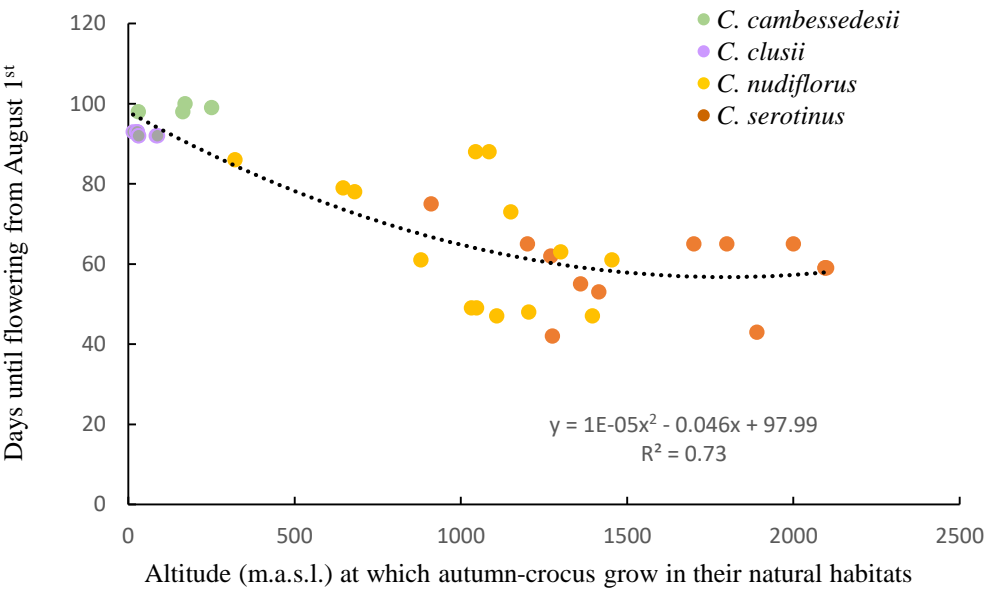

Supplement: s1 [file s1]
